# Supplementary material for: Magnesium-Deficiency Effects on Pigments, Photosynthesis and Photosynthetic Electron Transport of Leaves, and Nutrients of Leaf Blades and Veins in Citrus sinensis Seedlings
Source: PubMed Central journal article supplement (PMC6843125; doi:10.3390/plants8100389), 2019-09-30
Supplement: plants-08-00389-s001.pdf [file plants-08-00389-s001.pdf]

## Supplementary Data

**Table S1.** Pearson correlation coefficient matrix for the concentrations of elements in leaf blades and veins.

|              | Blades       |               |               |              |                |                |               |             |               |             | Veins       |             |            |             |                |    |    |    |    |   |  |
|--------------|--------------|---------------|---------------|--------------|----------------|----------------|---------------|-------------|---------------|-------------|-------------|-------------|------------|-------------|----------------|----|----|----|----|---|--|
|              | N            | P             | K             | Ca           | Mg             | Mn             | Fe            | Cu          | Zn            | B           | N           | P           | K          | Ca          | Mg             | Mn | Fe | Cu | Zn | B |  |
| Blade N      | 1            |               |               |              |                |                |               |             |               |             |             |             |            |             |                |    |    |    |    |   |  |
| Blade P      | 0.858<br>6 * | 1             |               |              |                |                |               |             |               |             |             |             |            |             |                |    |    |    |    |   |  |
| Blade K      | -0.65<br>06  | -0.67<br>90   | 1             |              |                |                |               |             |               |             |             |             |            |             |                |    |    |    |    |   |  |
| Blade Ca     | -0.34<br>93  | -0.39<br>52   | 0.931<br>4 ** | 1            |                |                |               |             |               |             |             |             |            |             |                |    |    |    |    |   |  |
| Blade Mg     | 0.695<br>8   | 0.324<br>8    | -0.70<br>99   | -0.62<br>69  | 1              |                |               |             |               |             |             |             |            |             |                |    |    |    |    |   |  |
| Blade Mn     | -0.53<br>10  | -0.13<br>42   | 0.599<br>6    | 0.576<br>0   | -0.96<br>83 ** | 1              |               |             |               |             |             |             |            |             |                |    |    |    |    |   |  |
| Blade Fe     | -0.58<br>85  | -0.81<br>50 * | 0.897<br>7 *  | 0.797<br>3   | -0.37<br>91    | 0.204<br>3     | 1             |             |               |             |             |             |            |             |                |    |    |    |    |   |  |
| Blade Cu     | -0.12<br>69  | -0.26<br>00   | 0.652<br>2    | 0.683<br>0   | -0.27<br>93    | 0.305<br>1     | 0.530<br>9    | 1           |               |             |             |             |            |             |                |    |    |    |    |   |  |
| Blade Zn     | -0.66<br>93  | -0.42<br>94   | 0.855<br>9 *  | 0.808<br>5   | -0.95<br>98 ** | 0.909<br>2 *   | 0.578<br>9    | 0.397<br>3  | 1             |             |             |             |            |             |                |    |    |    |    |   |  |
| Blade B      | -0.28<br>15  | -0.51<br>37   | 0.577<br>6    | 0.595<br>1   | -0.14<br>94    | -0.01<br>07    | 0.761<br>7    | -0.00<br>37 | 0.371<br>9    | 1           |             |             |            |             |                |    |    |    |    |   |  |
| Vein N       | -0.05<br>76  | 0.160<br>4    | 0.048<br>8    | 0.018<br>6   | -0.29<br>57    | 0.317<br>1     | -0.13<br>57   | 0.304<br>4  | 0.147<br>9    | -0.53<br>17 | 1           |             |            |             |                |    |    |    |    |   |  |
| Vein P       | 0.485<br>6   | 0.779<br>6    | -0.21<br>73   | 0.012<br>6   | -0.19<br>48    | 0.362<br>8     | -0.51<br>50   | 0.076<br>4  | 0.083<br>6    | -0.49<br>48 | 0.643<br>8  | 1           |            |             |                |    |    |    |    |   |  |
| Vein K       | -0.32<br>45  | -0.59<br>51   | 0.868<br>5 *  | 0.869<br>3 * | -0.28<br>30    | 0.175<br>6     | 0.927<br>3 ** | 0.761<br>0  | 0.507<br>7    | 0.629<br>8  | -0.04<br>11 | -0.30<br>12 | 1          |             |                |    |    |    |    |   |  |
| Leaf vein Ca | -0.12<br>23  | -0.53<br>05   | 0.396<br>6    | 0.321<br>3   | 0.251<br>8     | -0.40<br>18    | 0.674<br>7    | 0.507<br>4  | -0.09<br>50   | 0.369<br>3  | 0.149<br>9  | -0.39<br>88 | 0.720<br>0 | 1           |                |    |    |    |    |   |  |
| Vein Mg      | 0.538<br>3   | 0.067<br>3    | -0.40<br>32   | -0.33<br>41  | 0.922<br>0 **  | -0.95<br>93 ** | -0.00<br>29   | -0.13<br>11 | -0.78<br>83   | 0.205<br>8  | -0.41<br>64 | -0.40<br>49 | 0.066<br>8 | 0.516<br>0  | 1              |    |    |    |    |   |  |
| Vein Mn      | -0.64<br>46  | -0.28<br>60   | 0.671<br>5    | 0.603<br>1   | -0.97<br>54    | 0.983<br>6 *** | 0.305<br>6    | 0.346<br>1  | 0.932<br>1 ** | 0.045<br>0  | 0.231<br>2  | 0.197<br>7  | 0.248<br>4 | -0.33<br>73 | -0.93<br>31 ** | 1  |    |    |    |   |  |

|      |       |       |       |       |       |       |       |       |       |       |       |       |       |       |       |      |      |       |      |   |
|------|-------|-------|-------|-------|-------|-------|-------|-------|-------|-------|-------|-------|-------|-------|-------|------|------|-------|------|---|
|      |       |       |       |       | ***   |       |       |       |       |       |       |       |       |       |       |      |      |       |      |   |
| Vein | -0.13 | -0.10 | 0.587 | 0.711 | -0.48 | 0.398 | 0.528 | 0.142 | 0.599 | 0.645 | 0.187 | 0.276 | 0.516 | 0.212 | -0.24 | 0.33 |      |       |      |   |
| Fe   | 46    | 23    | 4     | 3     | 20    | 1     | 3     | 2     | 3     | 8     | 1     | 0     | 1     | 2     | 77    | 21   |      | 1     |      |   |
| Vein | -0.68 | -0.54 | 0.938 | 0.858 | -0.88 | 0.816 | 0.703 | 0.644 | 0.943 | 0.311 | 0.264 | 0.010 | 0.684 | 0.173 | -0.67 | 0.86 | 0.52 |       |      |   |
| Cu   | 86    | 85    | 1 **  | 7 *   | 09 *  | 3 *   | 4     | 1     | 0 **  | 5     | 3     | 7     | 3     | 2     | 71    | 25 * | 04   |       | 1    |   |
| Vein | -0.76 | -0.51 | 0.807 | 0.670 | -0.93 | 0.875 | 0.527 | 0.528 | 0.909 | 0.088 | 0.422 | 0.082 | 0.467 | 0.041 | -0.81 | 0.91 | 0.38 | 0.953 |      |   |
| Zn   | 50    | 30    | 9     | 0     | 23 ** | 4 *   | 9     | 0     | 8 *   | 9     | 7     | 9     | 8     | 1     | 72 *  | 36 * | 69   | 5 **  |      | 1 |
| Vein | -0.13 | 0.311 | 0.081 | 0.146 | -0.64 | 0.788 | -0.32 | -0.03 | 0.531 | -0.28 | 0.033 | 0.462 | -0.31 | -0.85 | -0.81 | 0.74 | 0.00 | 0.337 | 0.42 |   |
| B    | 13    | 2     | 6     | 7     | 34    | 1     | 75    | 26    | 4     | 93    | 2     | 8     | 33    | 01 *  | 26 *  | 39   | 38   | 9     | 91   | 1 |

\*, \*\*, and \*\*\* indicate significant at 5%, 1% and 1%, respectively.

Table S2. PCA for leaf gas exchange and related physiological parameters of upper, middle and lower leaves.

| Variables                            | Upper Leaves |        |        |        |        | Middle Leaves |        |        | Lower Leaves |        |
|--------------------------------------|--------------|--------|--------|--------|--------|---------------|--------|--------|--------------|--------|
|                                      | PC1          | PC2    | PC3    | PC4    | PC5    | PC1           | PC2    | PC3    | PC1          | PC2    |
| <b>Leaf gas exchange</b>             |              |        |        |        |        |               |        |        |              |        |
| CO <sub>2</sub> assimilation         | 0.464        | 0.748  | -0.296 | -0.149 | 0.279  | 0.842         | 0.248  | -0.425 | 0.995        | -0.064 |
| g <sub>s</sub>                       | 0.374        | 0.715  | -0.537 | -0.161 | -0.075 | 0.799         | 0.437  | -0.313 | 0.964        | 0.026  |
| C <sub>i</sub>                       | -0.073       | 0.426  | -0.575 | 0.040  | -0.609 | -0.622        | 0.434  | 0.505  | -0.963       | 0.195  |
| Transpiration rate                   | 0.514        | 0.307  | -0.736 | -0.160 | -0.127 | 0.769         | 0.320  | -0.290 | 0.957        | 0.025  |
| <b>Chl a fluorescence parameters</b> |              |        |        |        |        |               |        |        |              |        |
| F <sub>o</sub>                       | -0.856       | 0.399  | 0.192  | -0.120 | 0.223  | -0.992        | 0.067  | -0.065 | -0.983       | 0.107  |
| F <sub>m</sub>                       | -0.506       | 0.262  | 0.774  | -0.124 | 0.127  | 0.701         | -0.644 | 0.201  | 0.769        | 0.010  |
| F <sub>v</sub>                       | -0.338       | 0.190  | 0.880  | -0.112 | 0.082  | 0.868         | -0.449 | 0.159  | 0.953        | -0.056 |
| M <sub>o</sub>                       | -0.854       | 0.114  | 0.171  | 0.320  | -0.298 | -0.975        | 0.156  | 0.006  | -0.977       | 0.037  |
| ABS/RC                               | -0.889       | 0.157  | 0.130  | 0.267  | -0.240 | -0.970        | 0.197  | -0.019 | -0.977       | 0.197  |
| F <sub>v</sub> /F <sub>o</sub>       | 0.791        | -0.344 | 0.448  | 0.048  | -0.201 | 0.973         | -0.136 | 0.127  | 0.979        | -0.050 |
| DI <sub>o</sub> /RC                  | -0.933       | 0.290  | -0.182 | 0.102  | 0.000  | -0.947        | 0.259  | -0.063 | -0.979       | 0.180  |
| DI <sub>o</sub> /ABS                 | -0.787       | 0.352  | -0.434 | -0.060 | 0.208  | -0.958        | 0.235  | -0.107 | -0.989       | 0.112  |
| F <sub>v</sub> /F <sub>m</sub>       | 0.796        | -0.328 | 0.439  | 0.040  | -0.205 | 0.957         | -0.237 | 0.106  | 0.989        | -0.113 |
| RE <sub>o</sub> /ABS                 | 0.251        | 0.878  | 0.356  | -0.016 | 0.171  | 0.978         | -0.068 | 0.094  | 0.991        | -0.089 |
| ET <sub>o</sub> /ABS                 | 0.931        | -0.179 | 0.034  | -0.247 | 0.169  | 0.975         | -0.148 | 0.047  | 0.950        | 0.127  |
| PI <sub>abs,total</sub>              | 0.594        | 0.656  | 0.434  | -0.054 | 0.141  | 0.942         | -0.024 | 0.130  | 0.999        | 0.017  |
| <b>Leaf pigments</b>                 |              |        |        |        |        |               |        |        |              |        |
| Chl a                                | 0.296        | 0.502  | -0.159 | 0.766  | 0.212  | 0.853         | 0.476  | -0.003 | 0.990        | 0.100  |
| Chl b                                | 0.393        | 0.646  | 0.275  | 0.545  | -0.153 | 0.794         | 0.491  | -0.084 | 0.994        | 0.018  |
| Chl a + b                            | 0.339        | 0.569  | -0.038 | 0.737  | 0.114  | 0.844         | 0.480  | -0.019 | 0.992        | 0.082  |
| Car                                  | 0.040        | 0.883  | 0.096  | -0.429 | -0.099 | 0.662         | 0.577  | 0.456  | 0.951        | 0.286  |
| Chl a/b                              | -0.255       | -0.486 | -0.603 | 0.012  | 0.480  | 0.867         | 0.287  | 0.216  | 0.882        | 0.361  |
| Car/Chl                              | -0.130       | 0.624  | 0.077  | -0.743 | -0.155 | -0.297        | 0.171  | 0.878  | 0.197        | 0.965  |
| <b>Eigen value</b>                   | 7.724        | 5.717  | 4.118  | 2.538  | 1.238  | 16.264        | 2.594  | 1.792  | 19.566       | 1.342  |
| <b>Variation percent (%)</b>         | 35.110       | 25.988 | 18.717 | 11.536 | 5.626  | 73.925        | 11.789 | 8.143  | 88.938       | 6.101  |
